# Supplementary material for: The Novel Tubulin-Binding Checkpoint Activator BAL101553 Inhibits EB1-Dependent Migration and Invasion and Promotes Differentiation of Glioblastoma Stem-like Cells
Source: Oxford University Press journal article supplement (doi:10.1158/1535-7163.mct-16-0252), 2016-08-18
Supplement: 15357163mct160252-sup-165482_1_supp_3598137_qqvnrq.docx [file 15357163mct160252-sup-165482_1_supp_3598137_qqvnrq.docx]

**BAL27862**

**BAL101553**

**Supplementary Figure 1**
